# Supplementary material
Source: PubMed Central journal article supplement (PMC6478421)
Supplement: jciinsight-4-123817-s227.pdf [file jciinsight-4-123817-s227.pdf]

Supplementary Figure 1

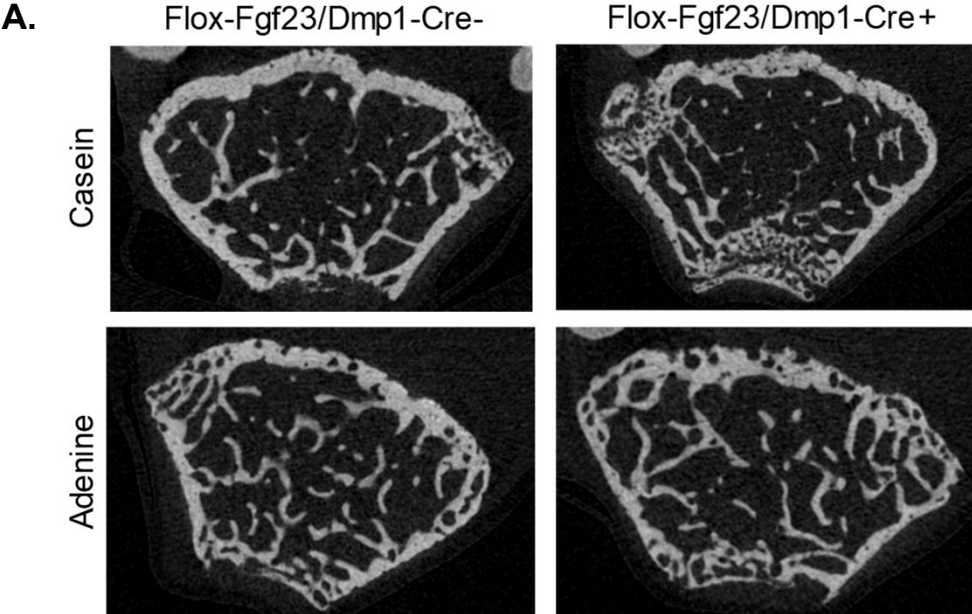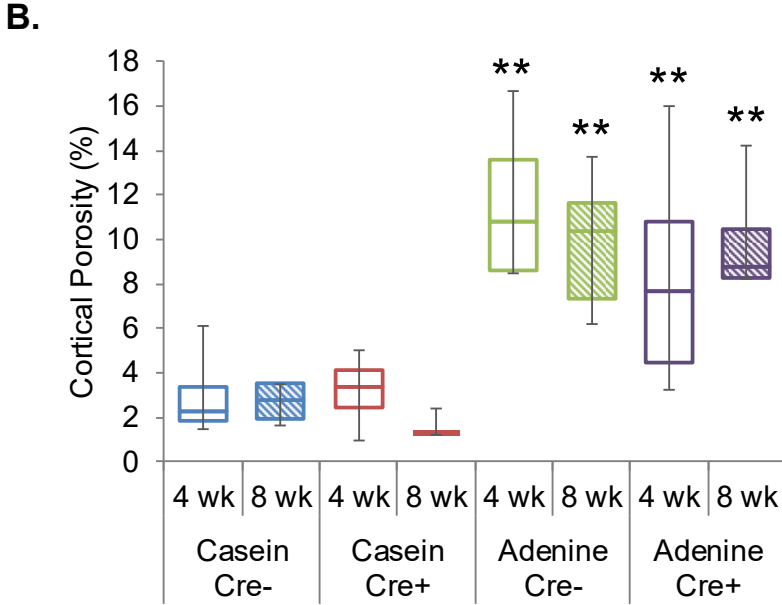

Supplementary Figure 2

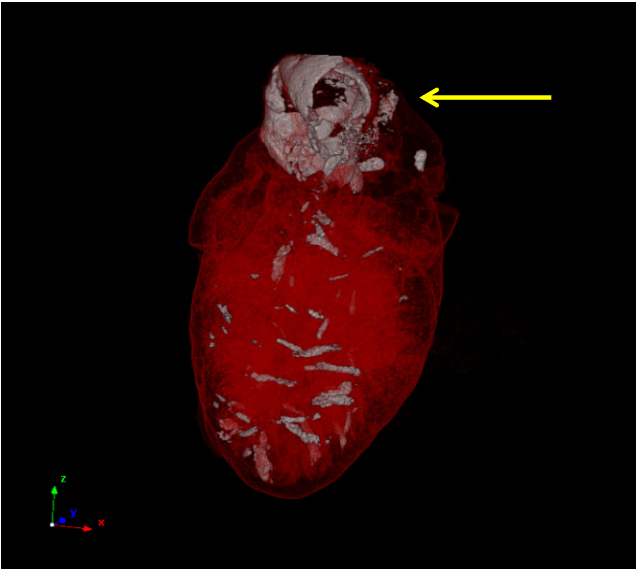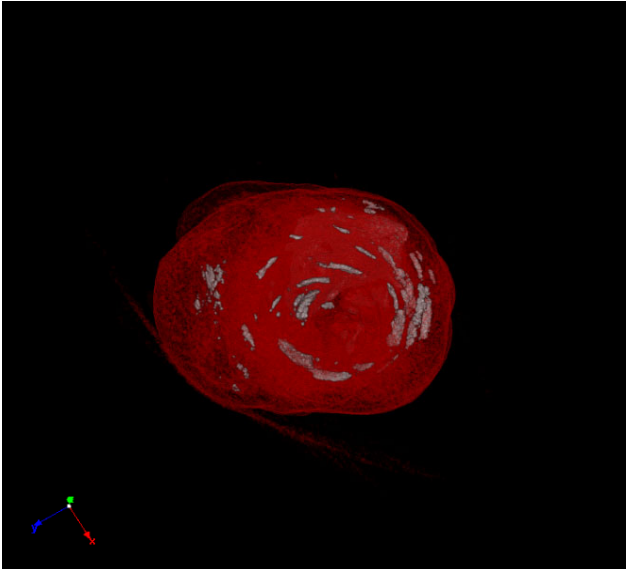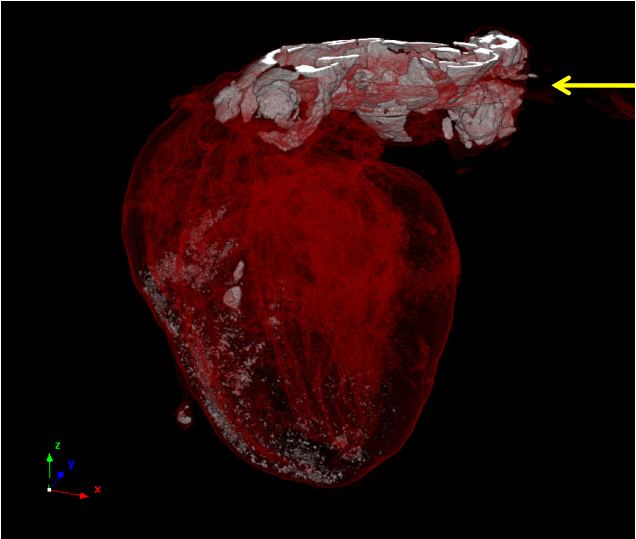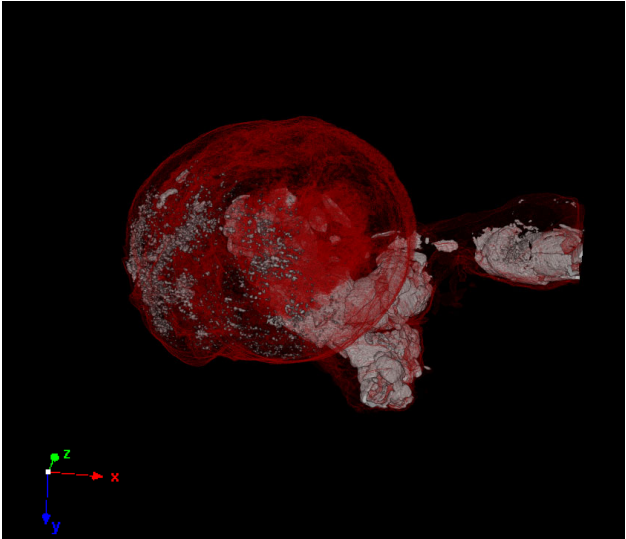

**Supplementary Figure 1. Relationships between reduced FGF23 and bone.** (A) As chronically elevated PTH levels are known to affect osteoclast activity, distal femora underwent micro-computed tomography analysis. The images showed higher porosity in the mice fed adenine diet. (B) Quantification demonstrated that cortical porosity was significantly higher in adenine fed mice even after 4 weeks of diet administration. There were no differences observed between genotypes. (n=4-6 per group; \*p<0.05 and \*\*p<0.01 vs casein diet same genotype; †p<0.05 and ††p<0.01 vs Cre- on same diet).

**Supplementary Figure 2. Left ventricle heart calcification occurs with clamped FGF23.** Lateral (left) and inferior (right)  $\mu$ CT images of two representative adenine-fed flox-Fgf23/DMP1-Cre<sup>+</sup> hearts highlight the calcification of the aorta (yellow arrow) as well as variability of calcification interspersed within the left ventricle (top heart images) or right ventricle (bottom images).
